# Supplementary figures and images for: In Silico Biology of H1N1: Molecular Modelling of Novel Receptors and Docking Studies of Inhibitors to Reveal New Insight in Flu Treatment
Source: Hindawi journal article supplement (doi:10.1155/2012/714623), 2012-01-01

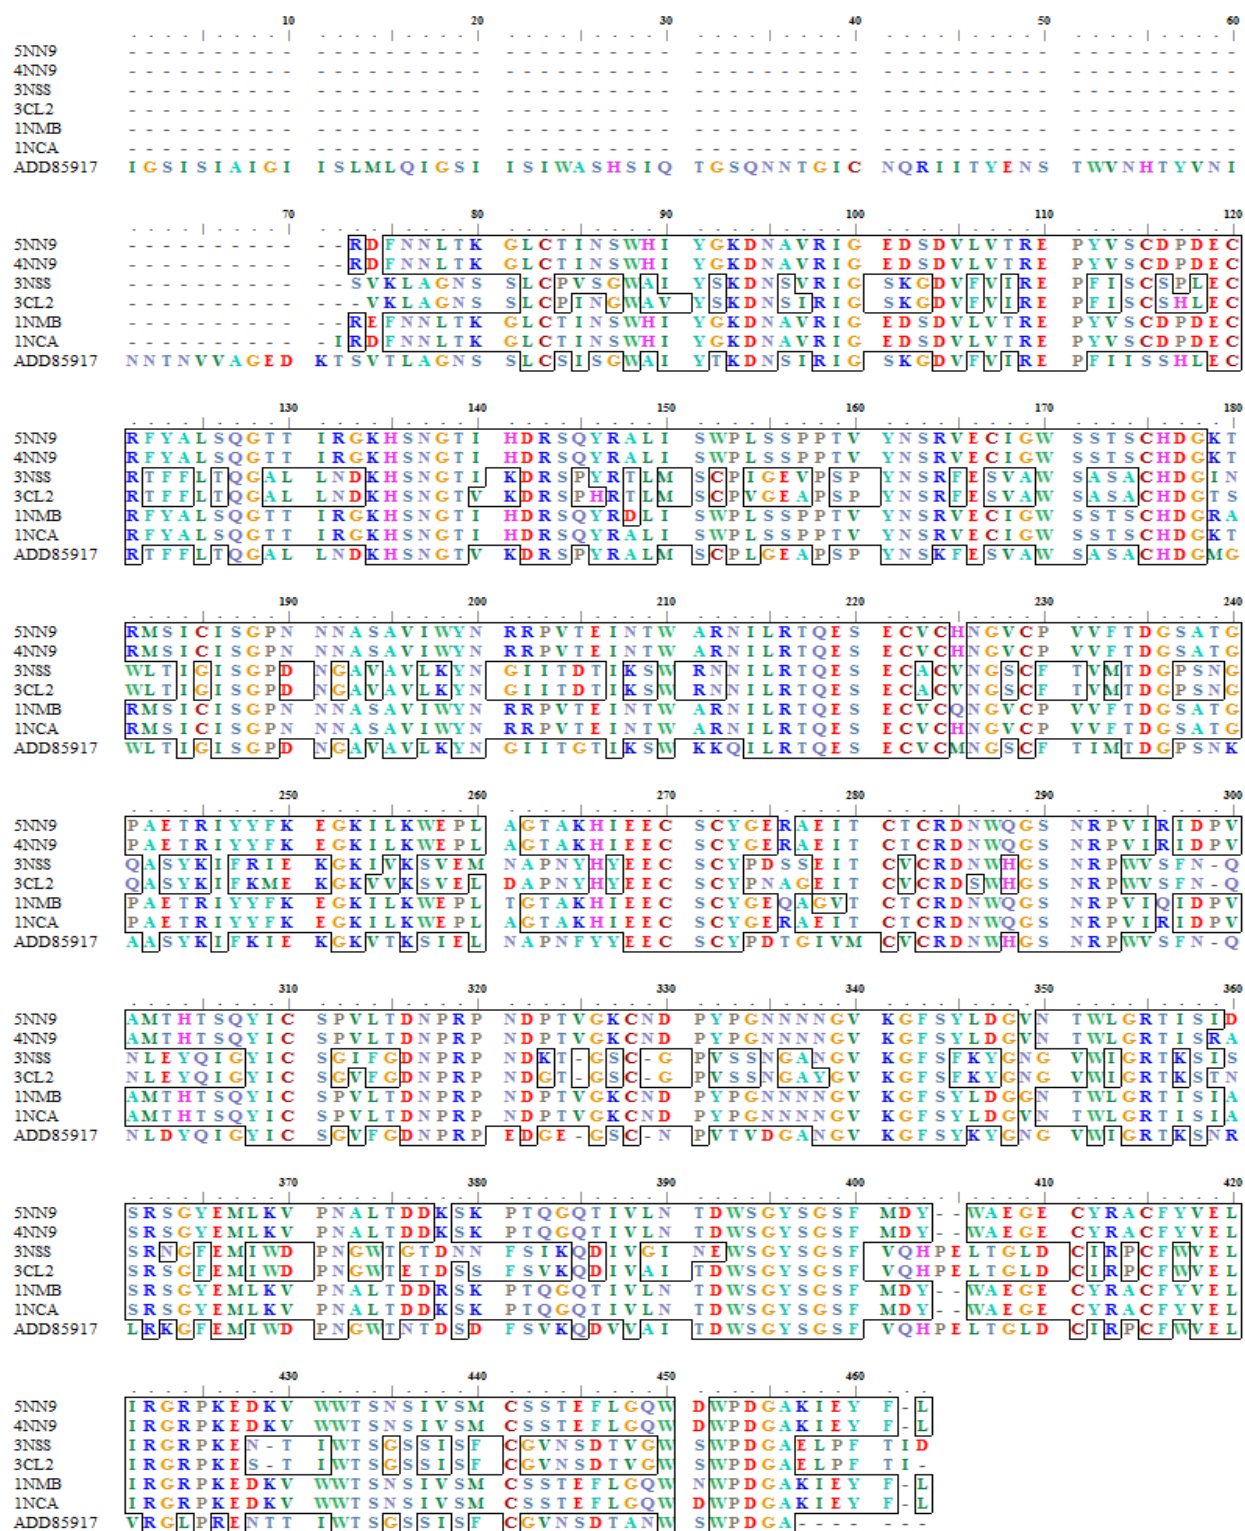

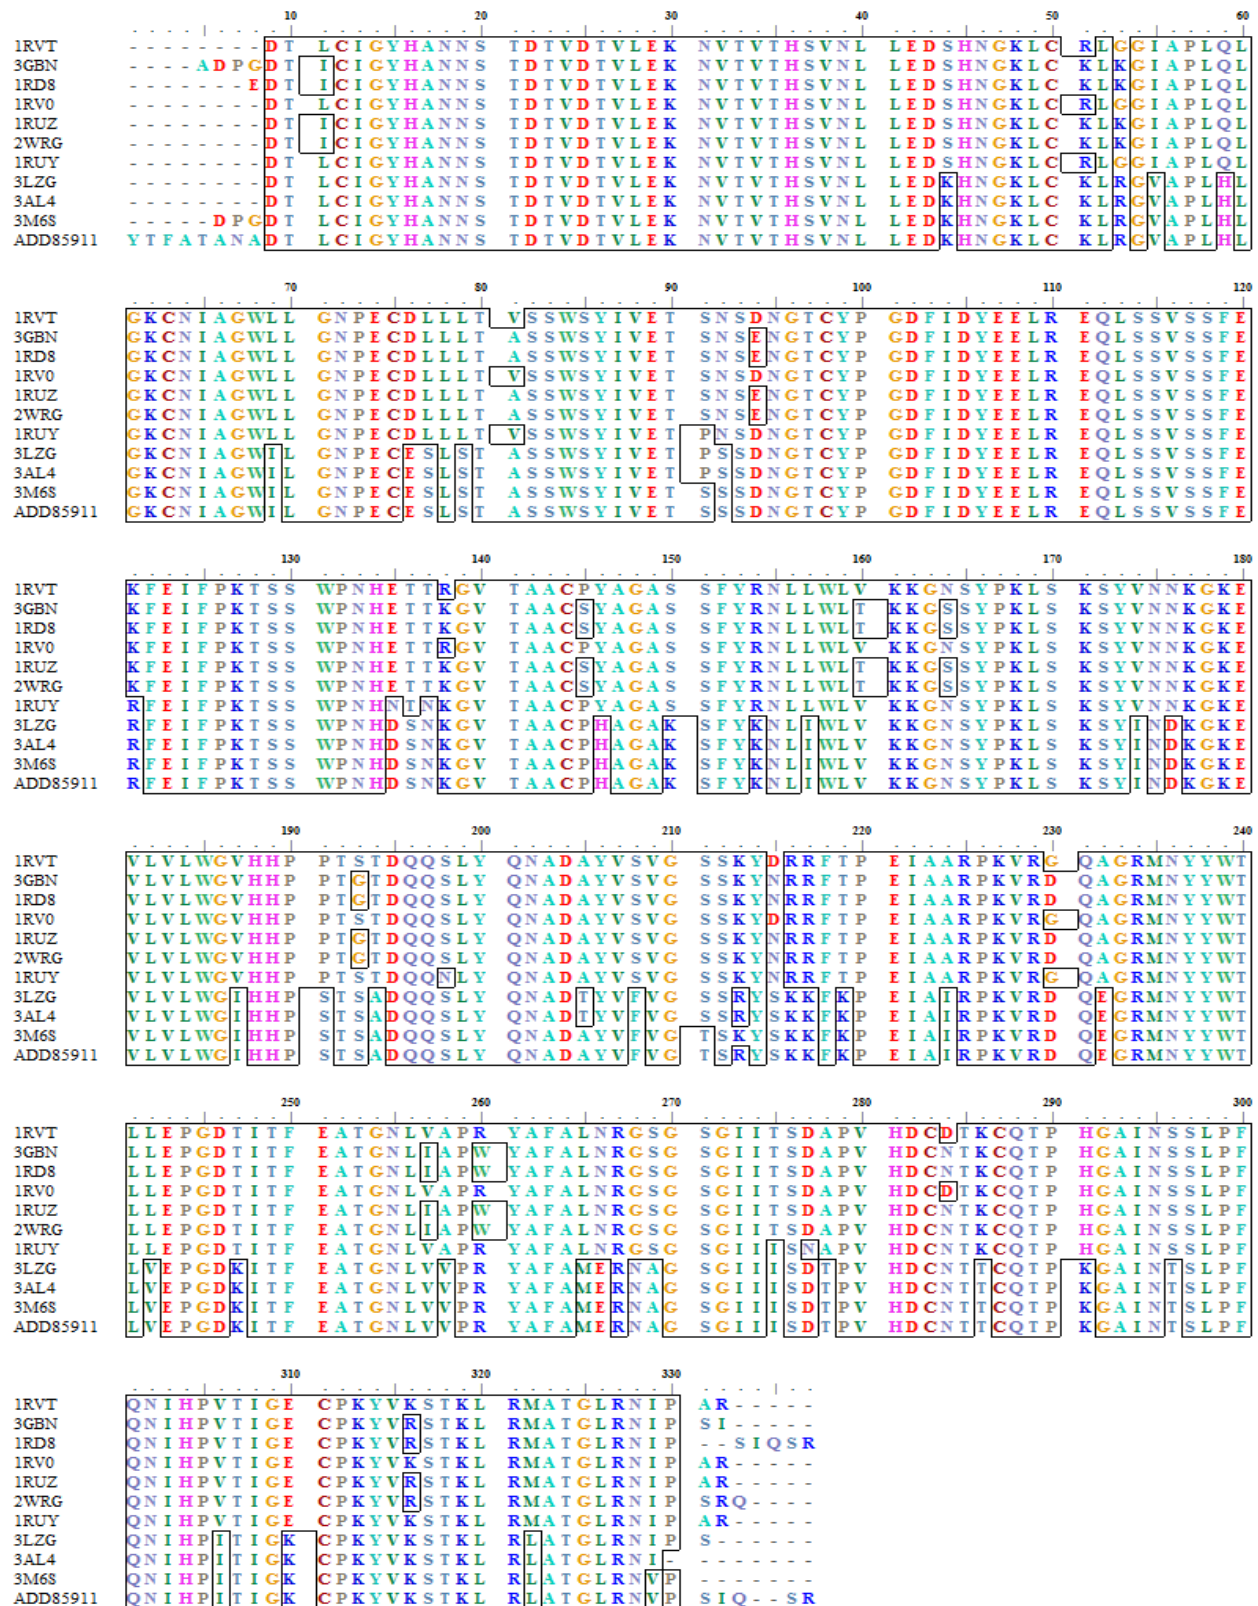

**Figure-2:** HA protein sequence (ADD85911) aligned with ten different template sequences

Supplement: f1 [file 714623.f1.pdf]
